# Supplementary material for: Acute hypoxia affects P-TEFb through HDAC3 and HEXIM1-dependent mechanism to promote gene-specific transcriptional repression
Source: PubMed Central journal article supplement — Nucleic Acids Res. 2014 Jul 23;42(14):8954–69. doi: 10.1093/nar/gku611 (PMC4132729; doi:10.1093/nar/gku611), 2014-07-23
Supplement: supp_gku611_nar-00872-x-2014-File010.pdf [file supp_gku611_nar-00872-x-2014-File010.pdf]

## Supplementary data

Acute hypoxia affects P-TEFb through HDAC3 and HEXIM1-dependent mechanism to promote gene-specific transcriptional repression.

Olga Safronova, Ken-ichi Nakahama, Ikuo Morita

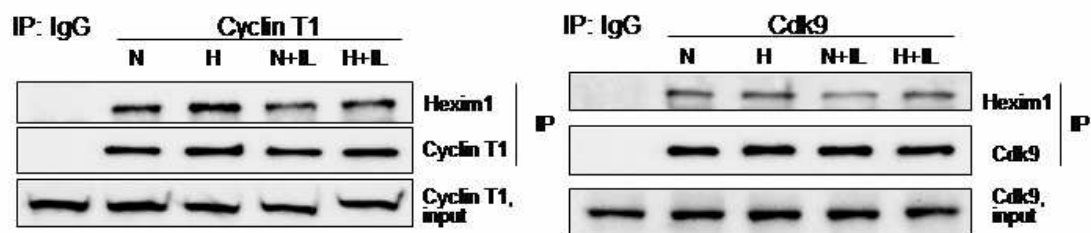

**Suppl. Fig. 1.** IgG controls for Cyclin T1 and Cdk9 immunoprecipitations. Cells were treated and immunoprecipitated as described in Fig. 1 A. Negative control for immunoprecipitation was performed using normal goat IgG or normal rabbit IgG.

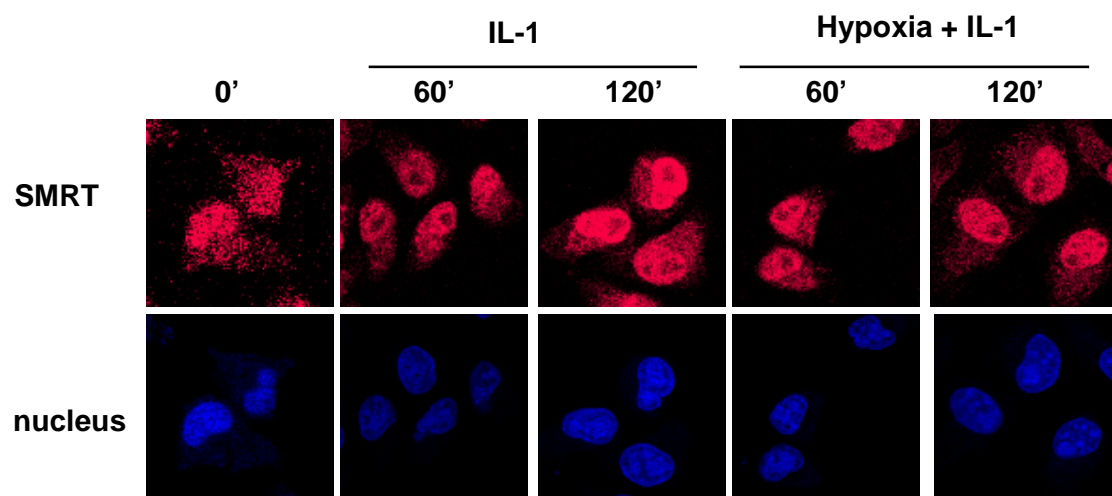

**Suppl. Fig. 2.** Subcellular localization of SMRT (red) in HeLa cells treated with IL-1 $\beta$  in normoxic and hypoxic environments for the indicated periods of time. Nucleic acids were stained using TOPRO-3 (blue).

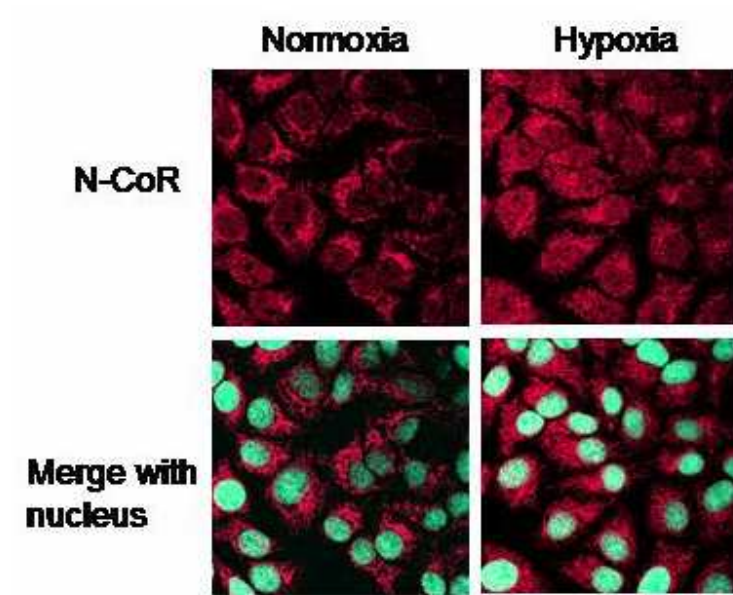

**Suppl. Fig. 3.** Subcellular localization of N-CoR (red) in HeLa cells incubated under normoxia or hypoxia for 2 hrs. Nuclei stained using SYTO 16 Nucleic Acid Stain (green).

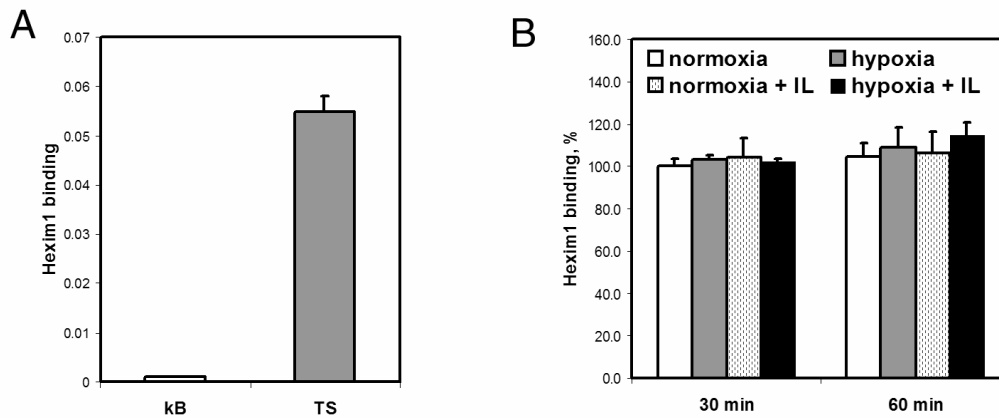

**Suppl. Fig. 4.** ChIP assay analysis of HEXIM1 occupancy of the MCP-1 gene regulatory region. **(A)** HEXIM1 occupancy of the NF- $\kappa$ B binding site within distal enhancer ( $\kappa$ B) and of the transcription start site (TS) of the MCP-1 gene regulatory region in normoxic untreated cells. Immunoprecipitated DNA copy numbers were calculated using calibration curve and normalized by 10% input copy numbers. **(B)** HEXIM1 occupancy of the transcription start site within the MCP-1 gene regulatory region under the treatment with IL-1 $\beta$  and/or hypoxia for the indicated periods of time. Data expressed as a percentage of binding in normoxic cells at 30 min time point after normalization by 10% input.

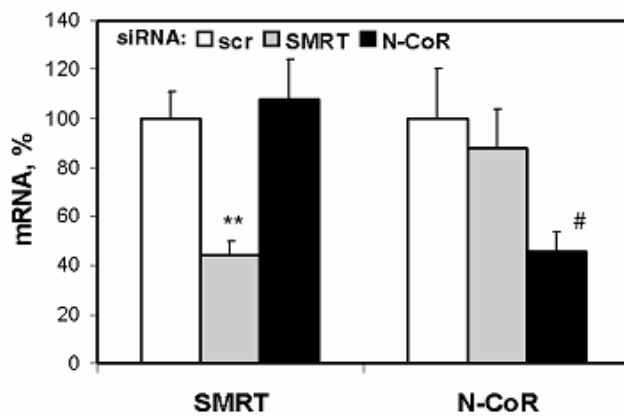

**Suppl. Fig. 5.** siRNAs directed to either SMRT or N-CoR specifically knocked-down targeted mRNA expression in HeLa cells. Total mRNA was isolated 48 hrs after transfection and analyzed by Q-PCR (n=6). \*\*  $P < 0.01$ , as compared with siScr for SMRT; #  $P < 0.05$ , as compared with siScr for N-CoR.

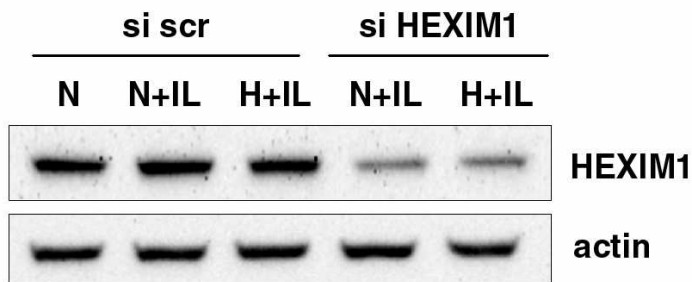

**Suppl. Fig. 6.** Analysis of specific Hexim1 knock-down in samples used for Agilent mRNA microarray analysis. HeLa cells were transfected with control (siScr) and HEXIM1-targeted (siHEXIM) double-strand siRNA and 48 hr after were left untreated under normoxic condition (N) or treated with IL-1 $\beta$  in combination with normoxia (N+IL) or hypoxia (H+IL) for 1 hr. HEXIM1 protein expression was strongly suppressed in HeLa cells transfected with siRNA directed to HEXIM1, but not in control samples, as analyzed by Western Blot.

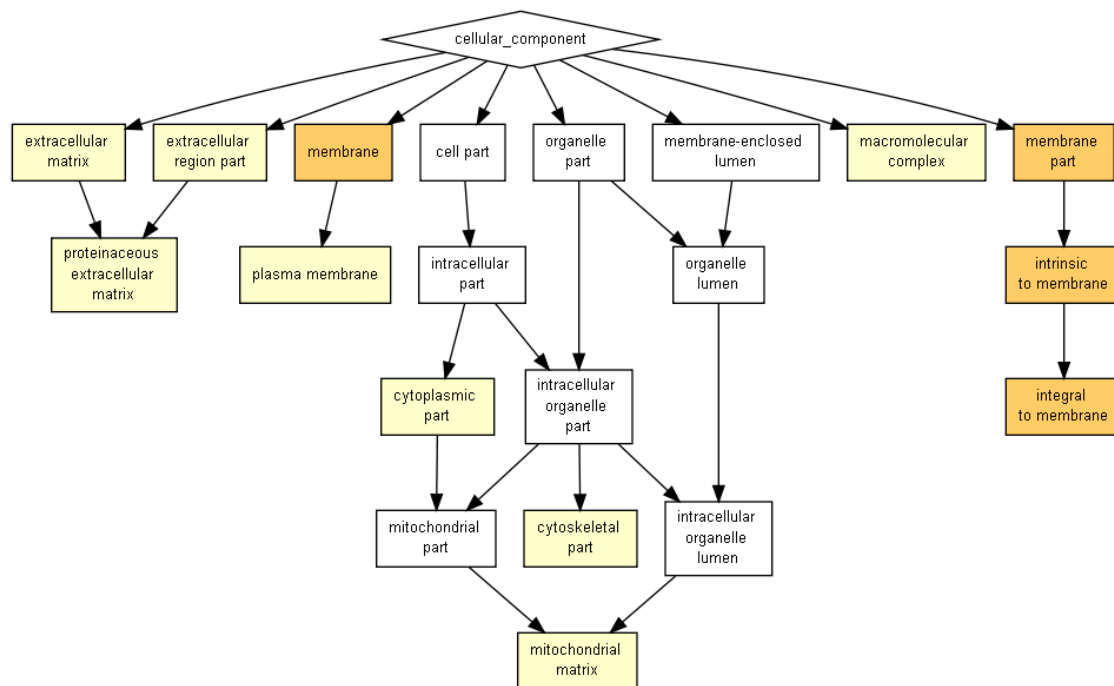

**Suppl. Fig. 7.** Gene ontology's hierarchical annotation tree structure of terms related to cellular component. P-value color scale: white -  $> 10^{-3}$ , yellow -  $10^{-3}$  to  $10^{-5}$ , orange -  $10^{-5}$  to  $10^{-7}$ .

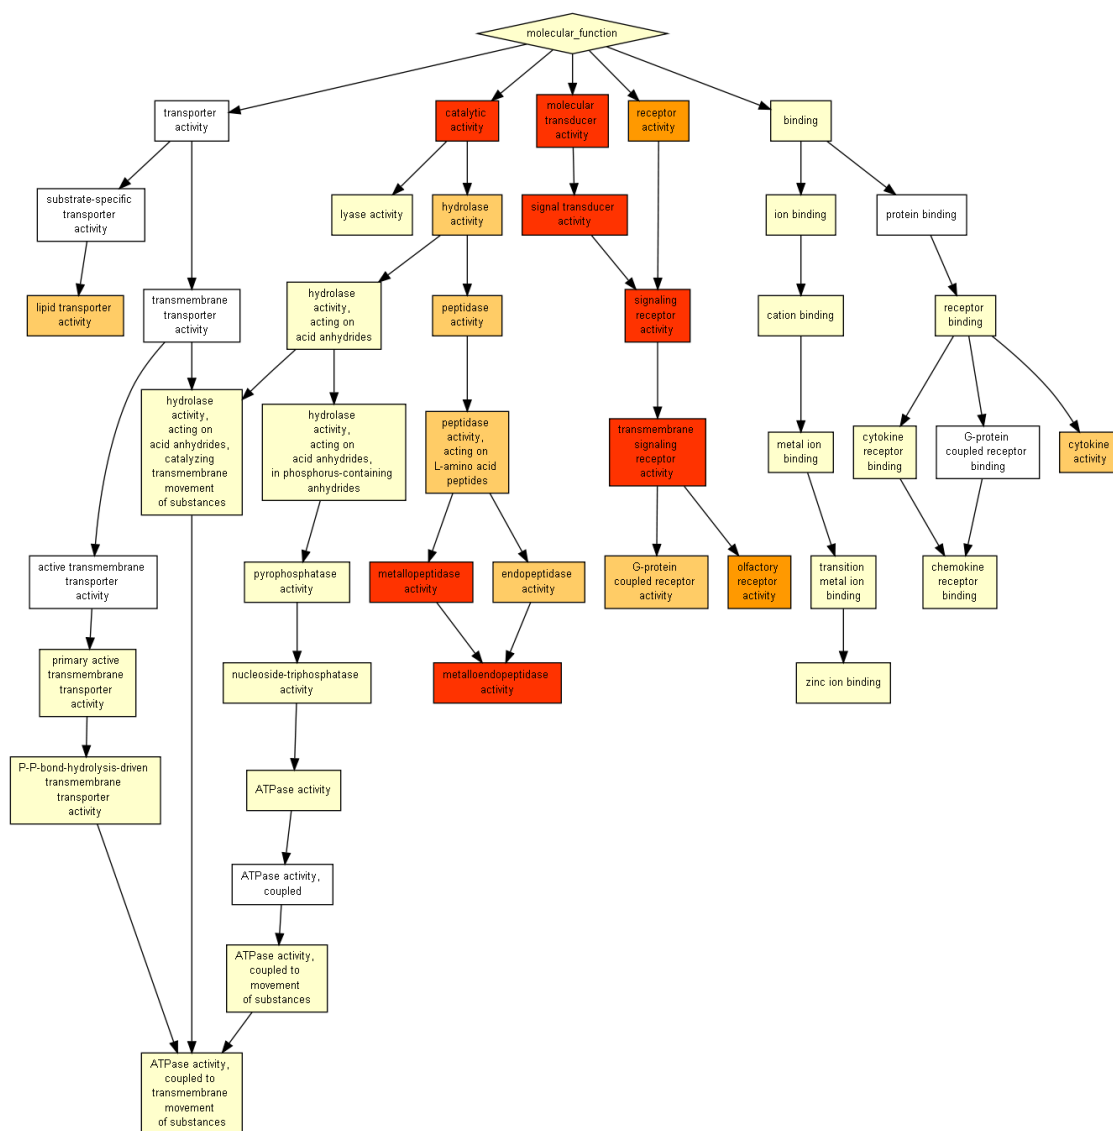

**Suppl. Fig. 8.** Gene ontology's hierarchical annotation tree structure of terms related to molecular function. P-value color scale: white -  $> 10^{-3}$ , yellow -  $10^{-3}$  to  $10^{-5}$ , orange -  $10^{-5}$  to  $10^{-7}$ , dark orange -  $10^{-7}$  to  $10^{-9}$ , red -  $< 10^{-9}$ .





**Supplementary Table 1.** Functional enrichment of gene ontology (GO) terms in the list of HEXIM1-dependent genes that are differentially expressed in hypoxia.

### Gene Ontology for Cellular Component

| GO term                            | Enrichment | No. of genes | P-value               |
|------------------------------------|------------|--------------|-----------------------|
| Membrane part                      | 1.06       | 424          | $2.11 \times 10^{-7}$ |
| Intrinsic to membrane              | 1.06       | 385          | $5.49 \times 10^{-7}$ |
| Integral to membrane               | 1.06       | 370          | $2.12 \times 10^{-6}$ |
| Membrane                           | 1.09       | 319          | $8.15 \times 10^{-6}$ |
| Extracellular matrix               | 2.68       | 20           | $2.20 \times 10^{-5}$ |
| Plasma membrane                    | 1.10       | 243          | $2.87 \times 10^{-5}$ |
| Extracellular region part          | 1.44       | 77           | $5.81 \times 10^{-5}$ |
| Cytoskeletal part                  | 1.45       | 54           | $1.86 \times 10^{-4}$ |
| Macromolecular complex             | 1.29       | 109          | $3.71 \times 10^{-4}$ |
| Mitochondrial matrix               | 20.75      | 3            | $7.13 \times 10^{-4}$ |
| Proteinaceous extracellular matrix | 10.21      | 5            | $8.26 \times 10^{-4}$ |
| Cytoplasmic part                   | 1.73       | 41           | $9.76 \times 10^{-4}$ |

### Gene Ontology for Molecular Function

| GO term                                                          | Enrichment | No. of genes | P-value                |
|------------------------------------------------------------------|------------|--------------|------------------------|
| Signaling receptor activity                                      | 1.43       | 116          | $3.26 \times 10^{-11}$ |
| Transmembrane signaling receptor activity                        | 1.43       | 109          | $1.66 \times 10^{-10}$ |
| Metallopeptidase activity                                        | 20.79      | 9            | $1.67 \times 10^{-10}$ |
| Metalloendopeptidase activity                                    | 26.39      | 8            | $2.03 \times 10^{-10}$ |
| Signal transducer activity                                       | 1.32       | 131          | $5.98 \times 10^{-10}$ |
| Catalytic activity                                               | 3.81       | 22           | $6.76 \times 10^{-10}$ |
| Receptor activity                                                | 1.35       | 129          | $1.10 \times 10^{-8}$  |
| Olfactory receptor activity                                      | 1.61       | 40           | $6.63 \times 10^{-8}$  |
| G-protein coupled receptor activity                              | 1.44       | 75           | $2.17 \times 10^{-7}$  |
| Hydrolase activity                                               | 5.41       | 14           | $4.67 \times 10^{-7}$  |
| Lipid transporter activity                                       | 12.94      | 6            | $1.78 \times 10^{-6}$  |
| Cytokine activity                                                | 1.96       | 26           | $4.62 \times 10^{-6}$  |
| Peptidase activity                                               | 8.32       | 9            | $6.24 \times 10^{-6}$  |
| ATPase activity, coupled to transmembrane movement of substances | 12.24      | 5            | $2.54 \times 10^{-5}$  |
| Receptor binding                                                 | 1.48       | 70           | $4.14 \times 10^{-5}$  |
| Cytokine receptor binding                                        | 1.93       | 22           | $6.32 \times 10^{-5}$  |
| Metal ion binding                                                | 2.92       | 17           | $8.99 \times 10^{-5}$  |
| ATPase activity                                                  | 41.23      | 3            | $2.11 \times 10^{-4}$  |
| Lyase activity                                                   | 2.73       | 10           | $2.49 \times 10^{-4}$  |

|                                    |      |    |                       |
|------------------------------------|------|----|-----------------------|
| Transition metal ion binding       | 3.87 | 12 | $3.13 \times 10^{-4}$ |
| Pyrophosphatase activity           | 1.67 | 27 | $3.24 \times 10^{-4}$ |
| Zinc ion binding                   | 3.82 | 12 | $4.6 \times 10^{-4}$  |
| Nucleoside triphosphatase activity | 1.66 | 26 | $5.04 \times 10^{-4}$ |
| Molecular function                 | 1.18 | 72 | $5.54 \times 10^{-4}$ |
| Chemokine receptor binding         | 4.11 | 7  | $6.38 \times 10^{-4}$ |

### Gene Ontology for Biological Process

| GO term                                                 | Enrichment | No. of genes | P-value               |
|---------------------------------------------------------|------------|--------------|-----------------------|
| Cellular response to stimulus                           | 1.34       | 154          | $9.32 \times 10^{-7}$ |
| Signal transduction                                     | 1.38       | 136          | $9.77 \times 10^{-7}$ |
| Proteolysis                                             | 8.40       | 10           | $1.13 \times 10^{-6}$ |
| Response to stimulus                                    | 1.27       | 199          | $2.24 \times 10^{-6}$ |
| Cell surface receptor signaling pathway                 | 1.48       | 92           | $3.15 \times 10^{-6}$ |
| Protein metabolic process                               | 4.37       | 15           | $3.88 \times 10^{-6}$ |
| Positive regulation of biological process               | 1.17       | 174          | $2.23 \times 10^{-5}$ |
| Positive regulation of cellular process                 | 1.23       | 144          | $3.59 \times 10^{-5}$ |
| Lipid transport                                         | 7.55       | 7            | $8.69 \times 10^{-5}$ |
| Positive regulation of hydrolase activity               | 6.40       | 8            | $1.25 \times 10^{-4}$ |
| Positive regulation of protein phosphorylation          | 1.70       | 30           | $1.84 \times 10^{-4}$ |
| Cellular response to nutrient levels                    | 35.73      | 3            | $2.7 \times 10^{-4}$  |
| Regulation of small GTPase mediated signal transduction | 7.66       | 6            | $4.21 \times 10^{-4}$ |
| Regulation of cellular component movement               | 5.69       | 8            | $4.39 \times 10^{-4}$ |
| Positive regulation of protein modification process     | 1.62       | 32           | $5.87 \times 10^{-4}$ |
| Positive regulation of molecular function               | 3.76       | 12           | $5.92 \times 10^{-4}$ |
| Regulation of apoptotic process                         | 1.65       | 34           | $8.84 \times 10^{-4}$ |
| Negative regulation of cell migration                   | 11.14      | 4            | $9.13 \times 10^{-4}$ |
| Regulation of cell motility                             | 5.93       | 7            | $9.67 \times 10^{-4}$ |

**Supplementary Table 2.** Hypoxia down-regulated HEXIM1-dependent genes from EGF and proteolysis groups as analyzed by DAVID functional annotations.

| <b>Function</b>               | <b>Gene</b>      | <b>Gene name</b>                                                  |
|-------------------------------|------------------|-------------------------------------------------------------------|
| Epidermal growth factor (EGF) | ADAM11           | ADAM metallopeptidase domain 11                                   |
|                               | ADAM23           | ADAM metallopeptidase domain 23                                   |
|                               | ADAM33           | ADAM metallopeptidase domain 33                                   |
|                               | CD248            | CD248 molecule, endosialin                                        |
|                               | ELTD1            | EGF, latrophilin and severn transmembrane domain containing 1     |
|                               | EGFL6            | EGF-like-domain, multiple 6                                       |
|                               | FAT3             | FAT tumor suppressor homolog 3 (Drosophila)                       |
|                               | ACAN             | Aggrecan                                                          |
|                               | ATRNL1           | Attractin-like 1                                                  |
|                               | F10              | Coagulation factor X                                              |
|                               | DLK1             | Delta-like 1 homolog (Drosophila)                                 |
|                               | EREG             | Epiregulin                                                        |
|                               | EYS              | Eyes shut homolog (Drosophila)                                    |
|                               | FAM53A           | Family with sequence similarity 5, member B                       |
|                               | LDLR             | Low density lipoprotein receptor                                  |
|                               | MEP1A            | Meprin A, alpha (PABA peptide hydrolase)                          |
|                               | NTNG1            | Netrin G1                                                         |
|                               | PAMR1            | Peptidase domain containing associated with muscle regeneration 1 |
|                               | SELP             | Selectin P (granule membrane protein 140KDa, antigen Cd62)        |
|                               | SLIT1            | Slit homolog 1 (Drosophila)                                       |
| TNXB                          | Tenascin XB      |                                                                   |
| THBS2                         | Thrombospondin 2 |                                                                   |
| THBS3                         | Thrombospondin 3 |                                                                   |
| Proteolysis                   | ADAM11           | ADAM metallopeptidase domain 11                                   |
|                               | ADAM23           | ADAM metallopeptidase domain 23                                   |
|                               | ADAM30           | ADAM metallopeptidase domain 30                                   |
|                               | ADAM33           | ADAM metallopeptidase domain 33                                   |
|                               | ADAMTS5          | ADAM metallopeptidase with thrombospondin type 1 motif, 5         |
|                               | ADAMTS6          | ADAM metallopeptidase with thrombospondin type 1 motif, 6         |
|                               | AGBL4            | ATP/GTP binding protein-like 4                                    |
|                               | WFDC10A          | WAP four-disulfide core domain 10A                                |
|                               | WFDC2            | WAP four-disulfide core domain 2                                  |
|                               | A2ML1            | Alpha-2-macroglobulin-like 1                                      |
|                               | CAPN11           | Calpain 11                                                        |
|                               | CAPN3            | Calpain 3, (p94)                                                  |
|                               | CPA6             | Carboxypeptidase A6                                               |
|                               | CASP10           | Caspase 10, apoptosis-related cysteine peptidase                  |
|                               | CMA1             | Chymase 1, mast cell                                              |
|                               | CELA1            | Chymotrypsin-like elastase family, member 1                       |
|                               | F10              | Coagulation factor X                                              |
|                               | F11              | Coagulation factor XI                                             |
|                               | FAP              | Fibroblast activation protein, alpha                              |
|                               | GGT5             | Gamma-glutamyltransferase 5                                       |
|                               | GGT7             | Gamma-glutamyltransferase 7                                       |
|                               | KLK13            | Kallikrein-related peptidase 13                                   |
|                               | MGRN1            | Mahogunin, ring finger 1                                          |
|                               | MASP2            | Mannan-binding lectin serine peptidase 2                          |

|           |                                                                                                      |
|-----------|------------------------------------------------------------------------------------------------------|
| PRSS38    | Marapsin 2                                                                                           |
| MMP21     | Matrix metallopeptidase 21                                                                           |
| MMP3      | Matrix metallopeptidase 3 (stromelysin 1, progelatinase)                                             |
| MEP1A     | Meprin A, alpha (PABA peptide hydrolase)                                                             |
| PAMR1     | Peptidase domain containing associated with muscle regeneration 1                                    |
| PCSK5     | Proprotein convertase subtilisin/kexin type 5                                                        |
| RNF148    | Ring finger protein 148                                                                              |
| RNF39     | Ring finger protein38                                                                                |
| SERPINA12 | Serpin peptidase inhibitor, clade A (alpha-1 antiproteinase, antitrypsin), member 12                 |
| SERPINA3  | Serpin peptidase inhibitor, clade A (alpha-1 antiproteinase, antitrypsin), member 3                  |
| SERPINA5  | Serpin peptidase inhibitor, clade A (alpha-1 antiproteinase, antitrypsin), member 5                  |
| SERPINA7  | Serpin peptidase inhibitor, clade A (alpha-1 antiproteinase, antitrypsin), member 7                  |
| SERPINA9  | Serpin peptidase inhibitor, clade A (alpha-1 antiproteinase, antitrypsin), member 9                  |
| SERPINA1  | Serpin peptidase inhibitor, clade G (C1 inhibitor ), member 1                                        |
| ADAMTS7   | Similar to hCG1991431; similar to COMPase; ADAM metallopeptidase with thrombospondin type 1 motif, 7 |
| TRIM61    | Similar to tripartite motif protein 21; tripartite motif-containing 61                               |
| SERP2     | Stress-associated endoplasmic reticulum protein family member 2                                      |
| TRIML1    | Tripartite motif family-like 1                                                                       |
| TRIM50    | Tripartite motif-containing 50                                                                       |
| TRIM64    | Tripartite motif-containing 64                                                                       |
| TRIM67    | Tripartite motif-containing 67                                                                       |
| TRIM9     | Tripartite motif-containing 9                                                                        |
| UBD       | Ubiquitin D                                                                                          |
| USP26     | Ubiquitin specific peptidase 26                                                                      |
| USP49     | Ubiquitin specific peptidase 49                                                                      |
| UBA7      | Ubiquitin-like modifier activating enzyme 7                                                          |
