# Supplementary material for: Acute hypoxia affects P-TEFb through HDAC3 and HEXIM1-dependent mechanism to promote gene-specific transcriptional repression
Source: PubMed Central journal article supplement — Nucleic Acids Res. 2014 Jul 23;42(14):8954–69. doi: 10.1093/nar/gku611 (PMC4132729; doi:10.1093/nar/gku611), 2014-07-23
Supplement: supp_gku611_nar-00872-x-2014-File011.pdf [file supp_gku611_nar-00872-x-2014-File011.pdf]

**Supplementary Table 3.** Selected individual HEXIM1-dependent genes are listed according to functional group for the hypoxia down-regulated and up-regulated gene categories. The genes that are belonging to several groups are listed only ones in a most relevant functional category.

### Immunity and defense, inflammatory response

|                      | Down-regulated by hypoxia                                                                                             |                                                                                                                                                                                                                                                                                                                                                                                                                                                                                                                                                                           | Up-regulated by hypoxia                  |                                                                                                                                                       |
|----------------------|-----------------------------------------------------------------------------------------------------------------------|---------------------------------------------------------------------------------------------------------------------------------------------------------------------------------------------------------------------------------------------------------------------------------------------------------------------------------------------------------------------------------------------------------------------------------------------------------------------------------------------------------------------------------------------------------------------------|------------------------------------------|-------------------------------------------------------------------------------------------------------------------------------------------------------|
| Function             | Gene                                                                                                                  | Gene name                                                                                                                                                                                                                                                                                                                                                                                                                                                                                                                                                                 | Gene                                     | Gene name                                                                                                                                             |
| Cytokine             | IL12B<br>IL22<br>IL3<br>IL36B<br>LEPROT<br>LIF<br><br>SIRPD<br>TNFSF11<br><br>BMP7<br>BMP8A<br>CD40LG<br>GDF6<br>GDF9 | Interleukin 12B (natural killer cell stimulatory factor 2, cytotoxic lymphocyte maturation factor 2, p40)<br>Interleukin 22<br>Interleukin 3 (colony-stimulating factor, multiple)<br>Interleukin 36, beta<br>Leptin receptor overlapping transcript<br>Leukemia inhibitory factor (cholinergic differentiation factor)<br>Signal-regulatory protein delta<br>Tumor necrosis factor (ligand) superfamily, member 11<br>Bone morphogenetic protein 7<br>Bone morphogenetic protein 8a<br>CD40 ligand<br>Growth differentiation factor 6<br>Growth differentiation factor 9 | S100A8<br>CSF3<br>IL17D<br>IL7<br>LEFTY1 | S100 calcium binding protein A8<br>Colony stimulating factor 3 (granulocyte)<br>Interleukin 17D<br>Interleukin 7<br>Left-right determination factor 1 |
| Interferone          | IFNA21<br>IFNW1                                                                                                       | Interferon, alpha 21<br>Interferon, omega 1                                                                                                                                                                                                                                                                                                                                                                                                                                                                                                                               | IFNA2<br>IFNE                            | Interferon, alpha 2<br>Interferon, epsilon                                                                                                            |
| Interleukin receptor | CSF2RB<br>IL1RAPL2                                                                                                    | Colony stimulating factor 2 receptor, beta, low-affinity (granulocyte-macrophage)<br>Interleukin 1 receptor accessory protein-like 2                                                                                                                                                                                                                                                                                                                                                                                                                                      | IL1RL2                                   | Interleukin 1 receptor-like 2                                                                                                                         |

|                                            |                                                                                                                   |                                                                                                                                                                                                                                                                                                                                                                                                                                                                            |                        |                                                                                                       |
|--------------------------------------------|-------------------------------------------------------------------------------------------------------------------|----------------------------------------------------------------------------------------------------------------------------------------------------------------------------------------------------------------------------------------------------------------------------------------------------------------------------------------------------------------------------------------------------------------------------------------------------------------------------|------------------------|-------------------------------------------------------------------------------------------------------|
|                                            | IL1RL1<br>IL2RA<br>IL28RA                                                                                         | Interleukin 1 receptor-like 1<br>Interleukin 2 receptor, alpha<br>Interleukin 28 receptor, alpha (interferon, lambda receptor)                                                                                                                                                                                                                                                                                                                                             |                        |                                                                                                       |
| Inflammatory response                      | ALOX15<br>CMA1<br>CYSLTR1<br>NCR3<br>NPPB<br>PLA2G2A<br><br>SELP<br><br>SERPINA3<br><br>TRIL                      | Arachidonate 15-lipoxygenase<br>Chymase 1, mast cell<br>Cysteinyl leukotriene receptor 1<br>Natural cytotoxicity triggering receptor 3<br>Natriuretic peptide B<br>Phospholipase A2, group IIA (platelets, synovial fluid)<br>Selectin P (granule membrane protein 140kDa, antigen CD62)<br>Serpine peptidase inhibitor, clade A (alpha-1 antitrypsin, antitrypsin), member 3<br>TLR4 interactor with leucine-rich repeats                                                 | AIF1<br>FYB            | Allograft inflammatory factor 1<br>FYN binding protein                                                |
| T-cell mediated immunity                   | CD2<br>CD69<br>CD7<br>LEMD1<br>TAPBPL<br>CTLA4<br>FOXP3<br>ICOSLG<br>VTCN1<br>HLA-DRA<br><br>NFATC2<br><br>SLAMF1 | CD2 molecule<br>CD69 molecule<br>CD7 molecule<br>LEM domain containing 1<br>TAP binding protein-like<br>Cytotoxic T-lymphocyte-associated protein 4<br>Forkhead box P3<br>Inducible T-cell co-stimulator ligand<br>V-set domain containing T cell activation inhibitor 1<br>Major histocompatibility complex, class II, DR alpha<br>Nuclear factor of activated T-cells, cytoplasmic, calcineurin-dependent 2<br>Signaling lymphocytic activation molecule family member 1 | CD247<br>CD3G<br>SIRPG | CD247 molecule<br>CD3g molecule, gamma (CD3-TCR complex)<br>Signal-regulatory protein gamma           |
| Immune response and innate immune response | CLEC4M<br>SERPING1                                                                                                | C-type lectin domain family 4, member M<br>Serpine peptidase inhibitor, clade G (C1 inhibitor), member 1                                                                                                                                                                                                                                                                                                                                                                   | CLEC4A<br>CTSG<br>OAS2 | C-type lectin domain family 4, member A<br>Cathepsin G<br>2'-5'-oligoadenylate synthetase 2, 69/71kDa |

|                               |                                                                                                                                       |                                                                                                                                                                                                                                                                                                                                                                                                                                                                                                                        |                      |                                                                                                         |
|-------------------------------|---------------------------------------------------------------------------------------------------------------------------------------|------------------------------------------------------------------------------------------------------------------------------------------------------------------------------------------------------------------------------------------------------------------------------------------------------------------------------------------------------------------------------------------------------------------------------------------------------------------------------------------------------------------------|----------------------|---------------------------------------------------------------------------------------------------------|
|                               | TNFSF11                                                                                                                               | Tumor necrosis factor (ligand) superfamily, member 11                                                                                                                                                                                                                                                                                                                                                                                                                                                                  | PRG4                 | Proteoglycan 4                                                                                          |
|                               | VPREB1                                                                                                                                | Pre-B lymphocyte 1                                                                                                                                                                                                                                                                                                                                                                                                                                                                                                     |                      |                                                                                                         |
| Defense response to bacterium | S100A12<br>BPI<br>DEFB107B<br>DEFB107A<br>DEFB128<br>DEFB136<br>DMBT1<br>PLA2G2A<br><br>SELP<br><br>SLC11A1<br><br>SPAG11<br><br>TLR9 | S100 calcium binding protein A12<br>Bactericidal/permeability-increasing protein<br>Defensin, beta 107B<br>Defensin, beta 107A<br>Defensin, beta 128<br>Defensin, beta 136<br>Deleted in malignant brain tumors 1<br>Phospholipase A2, group IIA (platelets, synovial fluid)<br>Selectin P (granule membrane protein 140kDa, antigen CD62<br>Solute carrier family 11 (proton-coupled divalent metal ion transporters), member 1<br>Sperm associated antigen 11A; sperm associated antigen 11B<br>Toll-like receptor 9 | FCER1G<br><br>RNASE7 | Fc fragment of IgE, high affinity I, receptor for; gamma polypeptide<br>Ribonuclease, RNase A family, 7 |

### Chemotaxis and cell migration, angiogenesis

|                                    | Down-regulated by hypoxia                       |                                                                                                                                                                                                       | Up-regulated by hypoxia                                           |                                                                                                                                                                                                                                   |
|------------------------------------|-------------------------------------------------|-------------------------------------------------------------------------------------------------------------------------------------------------------------------------------------------------------|-------------------------------------------------------------------|-----------------------------------------------------------------------------------------------------------------------------------------------------------------------------------------------------------------------------------|
| Function                           | Gene                                            | Gene name                                                                                                                                                                                             | Gene                                                              | Gene name                                                                                                                                                                                                                         |
| Chemokines and chemokine receptors | CCL14 (HCC-1)<br>CCL15 (MIP-1δ)<br>CCL25 (TECK) | Chemokine (C-C motif) ligand 14 (haemofiltrate CC chemokine-1<br>Chemokine (C-C motif) ligand 15 (macrophage inflammatory protein-1δ)<br>Chemokine (C-C motif) ligand 25 (thymus-expressed chemokine) | CCL1 (I-309)<br>CCL19 (MIP-3β)<br>SIRPB1<br>SIRPG<br>CXCL8 (IL8)* | Chemokine (C-C motif) ligand 1<br>Chemokine (C-C motif) ligand 19 (macrophage inflammatory protein-3β)<br>Signal-regulatory protein beta 1<br>Signal-regulatory protein gamma<br>Chemokine (C-X-C motif) ligand 8 (Interleukin 8) |

|                            |                                                                        |                                                                                                                                                                                                                        |      |            |
|----------------------------|------------------------------------------------------------------------|------------------------------------------------------------------------------------------------------------------------------------------------------------------------------------------------------------------------|------|------------|
|                            | CXCL6 (GCP-2)<br>CCL2 (MCP-1)*<br>CCR2**<br>CCRL1                      | Chemokine (C-X-C motif) ligand 6 (granulocyte chemotactic protein 2)<br>Chemokine (C-C motif) ligand 2 (monocyte chemoattractant protein)<br>Chemokine (C-C motif) receptor 2<br>Chemokine (C-C motif) receptor-like 1 |      |            |
| Regulation of angiogenesis | CD248<br>TLX2<br>AMOTL2<br>ANGPT4<br>NRP2<br>EPHA2<br>FGFR2<br>ZC3H12A | Cd248 molecule, endosialin<br>T-cell leukemia homeobox 2<br>Angiomotin like 2<br>Angiopoietin 4<br>Neuropilin 2<br>EPH receptor A2<br>Fibroblast growth factor receptor 2<br>Zinc finger CCCH-type containing 12A      | AMOT | angiomotin |

\* - these chemokines were added to the table based on RT-qPCR observations.

\*\* - CCR2 is a receptor for CCL2/MCP-1, CCL7/MCP-3, CCL12, CCL13/MCP-4 and CCL16/HCC-4 chemokines.

### ATPase activity, mitochondrion function, respiratory chain

|                 | Down-regulated by hypoxia                    |                                                                                                                                                                                                                                                                                | Up-regulated by hypoxia |                                                                                                                 |
|-----------------|----------------------------------------------|--------------------------------------------------------------------------------------------------------------------------------------------------------------------------------------------------------------------------------------------------------------------------------|-------------------------|-----------------------------------------------------------------------------------------------------------------|
| Function        | Gene                                         | Gene name                                                                                                                                                                                                                                                                      | Gene                    | Gene name                                                                                                       |
| ATPase activity | ABCA1<br>ABCB5<br>ABCC13<br>ATP10A<br>ATP2B2 | ATP-binding cassette, sub-family A (ABC1), member 1<br>ATP-binding cassette, sub-family B (MDR/TAP), member 5<br>ATP-binding cassette, sub-family C (CFTR/MRP), member 13, pseudogene<br>ATPase, class V, type 10A<br>ATPase, Ca <sup>++</sup> transporting, plasma membrane 2 | ATAD3C<br>ATP2A1        | ATPase family, AAA domain containing 3C<br>ATPase, Ca <sup>++</sup> transporting, cardiac muscle, fast switch 1 |

|                                              |          |                                                        |         |                                                                                                                                                |
|----------------------------------------------|----------|--------------------------------------------------------|---------|------------------------------------------------------------------------------------------------------------------------------------------------|
| Mitochondrial function and respiratory chain | ACSM2B   | Acyl-CoA synthetase medium-chain family member 2B      | CA5B    | Carbonic anhydrase VB, mitochondrial<br>Cytochrome c oxidase subunit VIIb2<br>Cytochrome P450, family 4, subfamily Z, polypeptide 2 pseudogene |
|                                              | MRPS17   | Mitochondrial ribosomal protein S17                    | COX7B2  |                                                                                                                                                |
|                                              | MRPS25   | Mitochondrial ribosomal protein S25                    | CYP4Z2P |                                                                                                                                                |
|                                              | SFXN1    | Sideroflexin 1                                         |         |                                                                                                                                                |
|                                              | SLC25A27 | Solute carrier family 25, member 27                    |         |                                                                                                                                                |
|                                              | SLC25A48 | Solute carrier family 25, member 48                    |         |                                                                                                                                                |
|                                              | CYP11B2  | Cytochrome P450, family 11, subfamily B, polypeptide 2 |         |                                                                                                                                                |
|                                              | UCP1     | Uncoupling protein 1 (mitochondrial, proton carrier)   |         |                                                                                                                                                |

### Regulation of transcription, chromatin and histone modifications

|                                            | Down-regulated by hypoxia |                                                                                   | Up-regulated by hypoxia |                                            |
|--------------------------------------------|---------------------------|-----------------------------------------------------------------------------------|-------------------------|--------------------------------------------|
| Function                                   | Gene                      | Gene name                                                                         | Gene                    | Gene name                                  |
| Regulation of transcription, DNA dependent | CASZ1                     | Castor zinc finger 1                                                              | AKNA                    | AT-hook transcription factor               |
|                                            | CITED1                    | Cbp/p300-interacting transactivator, with Glu/Asp-rich carboxy-terminal domain, 1 | CDC5L                   | CDC5 cell division cycle 5-like (S. pombe) |
|                                            | GTF2IRD2                  | GTF2I repeat domain containing 2                                                  | CNOT4                   | CCr4-NOT transcription complex, subunit 4  |
|                                            | ZBTB20                    | Zinc finger and BTB domain containing 20                                          | EFV1                    | Ets variant 1                              |
|                                            | ZFP28                     | Zinc finger protein 28 homolog (mouse)                                            | LMCD1                   | LIM and cysteine-rich domains 1            |
|                                            | ZFP3                      | Zinc finger protein 3 homolog (mouse)                                             | SIM1                    | Single-minded homolog 1 (Drosophila)       |
|                                            | ZFP92                     | Zinc finger protein 92 homolog (mouse)                                            | SP140                   | SP140 nuclear body protein                 |
|                                            | ZIK1                      | Zinc finger protein interacting with K protein 1 homolog (mouse)                  | SP8                     | Sp8 transcription factor                   |
|                                            | ZNF382                    | Zinc finger protein 382                                                           | ZBTB8B                  | Zinc finger and BTB domain containing 8B   |
|                                            | ZNF425                    | Zinc finger protein 425                                                           | ZNF233                  | Zinc finger protein 233                    |
|                                            | ZNF45                     | Zinc finger protein 45                                                            | ZNF300P1                | Zinc finger protein 300 pseudogene 1       |
|                                            | ZNF501                    | Zinc finger protein 501                                                           | ZNF441                  | Zinc finger protein 441                    |
|                                            | ZNF554                    | Zinc finger protein 554                                                           | ZNF514                  | Zinc finger protein 514                    |
|                                            |                           |                                                                                   | ZNF541                  | Zinc finger protein 541                    |
|                                            |                           |                                                                                   | ZNF618                  | Zinc finger protein 618                    |

|                                                               |                                                                                                                                                                             |                                                                                                                                                                                                                                                                                                                                                                                                                                                                                                                                                                                                                                                                                                                                                            |                                                                           |                                                                                                                                                                                                                                                                                 |
|---------------------------------------------------------------|-----------------------------------------------------------------------------------------------------------------------------------------------------------------------------|------------------------------------------------------------------------------------------------------------------------------------------------------------------------------------------------------------------------------------------------------------------------------------------------------------------------------------------------------------------------------------------------------------------------------------------------------------------------------------------------------------------------------------------------------------------------------------------------------------------------------------------------------------------------------------------------------------------------------------------------------------|---------------------------------------------------------------------------|---------------------------------------------------------------------------------------------------------------------------------------------------------------------------------------------------------------------------------------------------------------------------------|
|                                                               | ZNF570<br>ZNF705G<br>ZNF711<br>ZNF829<br>ZNF862                                                                                                                             | Zinc finger protein 570<br>Zinc finger protein 705G<br>Zinc finger protein 711<br>Zinc finger protein 829<br>Zinc finger protein 862                                                                                                                                                                                                                                                                                                                                                                                                                                                                                                                                                                                                                       | ZNF680<br>ZNF730<br>ZNF773<br>ZNF876P                                     | Zinc finger protein 680<br>Zinc finger protein 730<br>Zinc finger protein 773<br>Zinc finger protein 876, pseudogene                                                                                                                                                            |
| Regulation of transcription from RNA Polymerase II promoter   | CSRNP1<br>FOXI3<br>INHBA<br>MYOCD<br>POLR2D<br>STON1-GTF2A1L<br>WWTR1                                                                                                       | Cysteine-serine-rich nuclear protein 1<br>Forkhead box I3<br>Inhibin, beta A<br>Myocardin<br>Polymerase (RNA) II (DNA directed) polypeptide D<br>STON1-GTF2A1L readthrough<br><br>WW domain containing transcription regulator 1                                                                                                                                                                                                                                                                                                                                                                                                                                                                                                                           | CHD2<br>FOXO4<br>FOXS1<br>GLIS3<br>NCBP1<br>TCF7                          | Chromodomain helicase DNA binding protein 2<br>Forkhead box O4<br>Forkhead box S1<br>GLIS family zinc finger 3<br>Nuclear cap binding protein subunit 1, 80kDa<br>Transcription factor 7 (T-cell specific, HMG-box)                                                             |
| Sequence-specific DNA binding transcriptional factor activity | ATF3<br>ATF7<br>DLX3<br>DMRT1<br>DMRT2<br>DUXA<br>HNF4A<br>IRX2<br>KLF2<br>LEF1<br>MSC<br>NANOGNB<br>NR1I3<br>NR4A2<br>PAX6<br>PRDM1<br>RBPJL<br><br>SOX9<br>VSX1<br>ZNF238 | Activating transcription factor 3<br>Activating transcription factor 7<br>Distal-less homeobox 3<br>Doublesex and mab-3 related transcription factor 1<br>Doublesex and mab-3 related transcription factor 2<br>Double homeobox A<br>Hepatocyte nuclear factor 4, alpha<br>Iroquois homeobox 2<br>Kruppel-like factor 2 (lung)<br>Lymphoid enhancer-binding factor 1<br>Musculin<br>NANOG neighbor homeobox<br>Nuclear receptor subfamily 1, group I, member 3<br>Nuclear receptor subfamily 4, group A, member 2<br>Paired box 6<br>PR domain containing 1, with ZNF domain<br>Recombination signal binding protein for immunoglobulin kappa J region-like<br>SRY (sex determining region Y)-box 9<br>Visual system homeobox 1<br>Zinc finger protein 238 | CUX2<br>FOXJ1<br>MYCN<br><br>VSX1<br>ZNF215<br>ZNF397<br>ZNF81<br>ZSCAN5B | Cut-like homeobox 2<br>Forkhead box J1<br>v-myc myelocytomatosis viral related oncogene, neuroblastoma derived (avian)<br>Visual system homeobox 1<br>Zinc finger protein 215<br>Zinc finger protein 397<br>Zinc finger protein 81<br>Zinc finger and SCAN domain containing 5B |

|                                     |                                          |                                                                                                                                                                                                                     |                                                                   |                                                                                                                                                                                                                                                                                               |
|-------------------------------------|------------------------------------------|---------------------------------------------------------------------------------------------------------------------------------------------------------------------------------------------------------------------|-------------------------------------------------------------------|-----------------------------------------------------------------------------------------------------------------------------------------------------------------------------------------------------------------------------------------------------------------------------------------------|
|                                     | ZSCAN5D                                  | Zinc finger and SCAN domain containing 5D                                                                                                                                                                           |                                                                   |                                                                                                                                                                                                                                                                                               |
| Chromatin and histone modifications | BRD8<br>KAT6B<br>RBM14<br>SUPT3H<br>TNP1 | Bromodomain containing 8<br>K(lysine) acetyltransferase 6B<br>RNA binding motif protein 14<br>Suppressor of Ty 3 homolog ( <i>S. cerevisiae</i> )<br>Transition protein 1 (during histone to protamine replacement) | BRCC3<br>BRPF3<br>NAT8<br>PRDM9<br>SETD3<br>TDRD3<br>UTY          | BRCA1/BRCA2-containing complex, subunit 3<br>Bromodomain and PHD finger containing, 3<br>N-acetyltransferase 8 (GCN5-related, putative)<br>PR domain containing 9<br>SET domain containing 3<br>Tudor domain containing 3<br>Ubiquitously transcribed tetratricopeptide repeat gene, Y-linked |
| Nucleosome core                     |                                          |                                                                                                                                                                                                                     | H2AFB2<br><br>H2AFJ<br>HIST1H2AA<br>HIST1H4D<br>HIST2H2BF<br>PRM3 | H2A histone family, member B2; H2A histone family, member B3<br>H2A histone family, member J<br>Histone cluster 1, H2aa<br>Histone cluster 1, H4i; histone cluster 4, H4<br>Histone cluster 2, H2bf<br>Protamine 3                                                                            |
